# Supplementary material for: Development and external validation of a breast cancer absolute risk prediction model in Chinese population
Source: Springer Nature journal article supplement (doi:10.1186/s13058-021-01439-2), 2021-05-29
Supplement: 13058_2021_1439_MOESM2_ESM.pdf [file 13058_2021_1439_MOESM2_ESM.pdf]

**Additional file 2. Age- and residence-specific breast cancer incidence rates and mortality rates of non-breast cancer per 100,000 person-years by data sources**

|       | CKB   |        |       |        | Nation |         |       |         | Shanghai |         |
|-------|-------|--------|-------|--------|--------|---------|-------|---------|----------|---------|
|       | Urban |        | Rural |        | Urban  |         | Rural |         | Urban    |         |
|       | $h_1$ | $h_2$  | $h_1$ | $h_2$  | $h_1$  | $h_2$   | $h_1$ | $h_2$   | $h_1$    | $h_2$   |
| 30-34 | 98.4  | 0.0    | 0.0   | 63.9   | 16.7   | 35.5    | 13.2  | 52.2    | 10.2     | 44.3    |
| 35-39 | 48.5  | 31.6   | 22.4  | 116.8  | 34.2   | 43.2    | 27.1  | 62.1    | 31.1     | 65.3    |
| 40-44 | 82.0  | 71.5   | 38.1  | 101.7  | 64.8   | 80.2    | 54.1  | 96.8    | 69.7     | 83.1    |
| 45-49 | 113.9 | 100.0  | 52.1  | 170.5  | 85.7   | 101.1   | 70.8  | 134.7   | 105      | 128.1   |
| 50-54 | 122.1 | 160.6  | 57.2  | 250.8  | 105.2  | 225.6   | 71.5  | 268.5   | 115.2    | 203.1   |
| 55-59 | 123.2 | 222.9  | 53.7  | 427.5  | 107.7  | 275.9   | 73.6  | 344.3   | 109.9    | 317.5   |
| 60-64 | 138.6 | 382.0  | 52.3  | 690.5  | 108.6  | 606.4   | 73.2  | 683.5   | 106.6    | 530.9   |
| 65-69 | 118.7 | 687.1  | 40.4  | 1208.0 | 98.7   | 1105.4  | 52.3  | 1285.2  | 103.3    | 993.7   |
| 70-74 | 100.6 | 1274.6 | 38.0  | 2152.1 | 92.5   | 1843.2  | 46.0  | 2225.7  | 113.3    | 1838.1  |
| 75-79 | 100.5 | 2422.5 | 34.6  | 3879.7 | 83.4   | 3482.2  | 39.0  | 3821.9  | 106      | 3547.3  |
| 80-84 | 81.7  | 4346.7 | 21.7  | 6699.8 | 74.9   | 6984.1  | 30.0  | 6776.3  | 74.9     | 6984.1  |
| 85-89 | 103.7 | 7925.7 | 157.9 | 7890.3 | 47.8   | 16282.3 | 22.1  | 14950.6 | 47.8     | 16282.3 |

Abbreviation: CKB, China Kadoorie Biobank;  $h_1$ , incidence rate of breast cancer;  $h_2$ , mortality rates of non-breast cancer.

CKB's rates were estimated among participants included in model derivation (2004–2016, n=300,824). National rates were calculated using incidence rates and breast cancer-specific mortality rates in 2014 from National Central Cancer Registry of China and all-cause mortality rates in 2014 from Health Statistics Yearbook. Shanghai's rates in age groups 30-79 were obtained from Zheng W, Wen W, Gao YT, et al. J Natl Cancer Inst 2010;102:972-81, while the rates in age groups 80-89 were replaced with national rates as they are not available in Zheng W et al.
