# Supplementary material for: Development and external validation of a breast cancer absolute risk prediction model in Chinese population
Source: Springer Nature journal article supplement (doi:10.1186/s13058-021-01439-2), 2021-05-29
Supplement: 13058_2021_1439_MOESM3_ESM.pdf [file 13058_2021_1439_MOESM3_ESM.pdf]

**Additional file 3. Age- and site-adjusted RR (95% CI) from the derivation subcohort and the whole China Kadoorie Biobank**

|                                                                    | Derivation subcohort |                      |                     | Whole cohort |                      |                     |
|--------------------------------------------------------------------|----------------------|----------------------|---------------------|--------------|----------------------|---------------------|
|                                                                    | Cases                | Cases/PYs (/100,000) | RR (95% CI)         | Cases        | Cases/PYs (/100,000) | RR (95% CI)         |
| <b>Highest education</b>                                           |                      |                      |                     |              |                      |                     |
| No formal school                                                   | 222                  | 43.65                | 1.00 (Reference)    | 339          | 44.64                | 1.00 (Reference)    |
| Primary school                                                     | 388                  | 61.47                | 1.19 (1.12 to 1.26) | 570          | 60.18                | 1.17 (1.11 to 1.23) |
| Middle school                                                      | 441                  | 86.19                | 1.41 (1.25 to 1.58) | 653          | 84.82                | 1.37 (1.24 to 1.51) |
| High school                                                        | 339                  | 125.95               | 1.67 (1.40 to 1.99) | 505          | 124.5                | 1.60 (1.39 to 1.85) |
| College/university                                                 | 146                  | 163.88               | 1.98 (1.56 to 2.50) | 220          | 165.2                | 1.87 (1.54 to 2.27) |
| <b>BMI at age &lt; 50 years, kg/m<sup>2</sup></b>                  |                      |                      |                     |              |                      |                     |
| <18.5                                                              | 17                   | 118.09               | 1.00 (Reference)    | 21           | 98.83                | 1.00 (Reference)    |
| 18.5-23.9                                                          | 235                  | 124.68               | 0.97 (0.84 to 1.12) | 357          | 126.42               | 0.95 (0.84 to 1.07) |
| 24.0-27.9                                                          | 116                  | 148.92               | 0.95 (0.71 to 1.26) | 187          | 160.42               | 0.90 (0.71 to 1.14) |
| ≥28                                                                | 35                   | 164.52               | 0.92 (0.60 to 1.41) | 43           | 135.81               | 0.85 (0.60 to 1.21) |
| <b>BMI at age ≥ 50 years, kg/m<sup>2</sup></b>                     |                      |                      |                     |              |                      |                     |
| <18.5                                                              | 23                   | 39.28                | 1.00 (Reference)    | 36           | 41.07                | 1.00 (Reference)    |
| 18.5-23.9                                                          | 438                  | 68.05                | 1.23 (1.14 to 1.33) | 642          | 66.66                | 1.25 (1.17 to 1.33) |
| 24.0-27.9                                                          | 472                  | 98.43                | 1.51 (1.29 to 1.77) | 683          | 94.59                | 1.57 (1.38 to 1.78) |
| ≥28                                                                | 200                  | 111.94               | 1.86 (1.47 to 2.35) | 318          | 118.27               | 1.96 (1.62 to 2.38) |
| <b>Height, cm</b>                                                  |                      |                      |                     |              |                      |                     |
| <150.2                                                             | 260                  | 52.68                | 1.00 (Reference)    | 382          | 51.58                | 1.00 (Reference)    |
| 150.2-154.1                                                        | 353                  | 69.95                | 1.12 (1.06 to 1.18) | 504          | 66.66                | 1.13 (1.09 to 1.18) |
| 154.2-158.1                                                        | 379                  | 74.94                | 1.25 (1.13 to 1.38) | 596          | 78.54                | 1.28 (1.18 to 1.39) |
| ≥158.2                                                             | 544                  | 107.56               | 1.40 (1.20 to 1.63) | 805          | 105.96               | 1.45 (1.28 to 1.65) |
| <b>No. of first-degree relatives diagnosed with overall cancer</b> |                      |                      |                     |              |                      |                     |
| 0                                                                  | 1,222                | 73.2                 | 1.00 (Reference)    | 1,795        | 71.63                | 1.00 (Reference)    |
| 1                                                                  | 258                  | 87.03                | 1.05 (0.91 to 1.20) | 402          | 90.71                | 1.10 (0.99 to 1.23) |
| ≥2                                                                 | 56                   | 128.2                | 1.46 (1.11 to 1.91) | 90           | 136.09               | 1.57 (1.27 to 1.95) |
| <b>No. of live birth</b>                                           |                      |                      |                     |              |                      |                     |
| Nulliparous                                                        | 33                   | 124.9                | 1.84 (1.26 to 2.68) | 45           | 112.79               | 1.78 (1.29 to 2.45) |
| 1                                                                  | 714                  | 102.53               | 1.57 (1.28 to 1.93) | 1,067        | 101.84               | 1.66 (1.40 to 1.96) |
| 2                                                                  | 476                  | 73.41                | 1.32 (1.12 to 1.57) | 719          | 74.19                | 1.41 (1.22 to 1.62) |
| ≥3                                                                 | 313                  | 49.03                | 1.00 (Reference)    | 456          | 47.58                | 1.00 (Reference)    |
| <b>Age at menarche, years</b>                                      |                      |                      |                     |              |                      |                     |
| <12                                                                | 127                  | 117.02               | 1.39 (1.16 to 1.67) | 187          | 114.7                | 1.52 (1.31 to 1.76) |
| 13-14                                                              | 482                  | 85.18                | 1.25 (1.10 to 1.41) | 748          | 88.12                | 1.32 (1.20 to 1.46) |
| 15-16                                                              | 562                  | 74.85                | 1.12 (1.05 to 1.19) | 837          | 74.27                | 1.15 (1.09 to 1.21) |
| ≥17                                                                | 365                  | 62.46                | 1.00 (Reference)    | 515          | 58.77                | 1.00 (Reference)    |

Abbreviations: BMI, body mass index; PY, person-year; RR, relative risk; CI, confidence interval.

Cox model was stratified by study sites (10 areas) and age at baseline in 5-year interval, and included all the predictors in the table.
