# Supplementary material for: Development and external validation of a breast cancer absolute risk prediction model in Chinese population
Source: Springer Nature journal article supplement (doi:10.1186/s13058-021-01439-2), 2021-05-29
Supplement: 13058_2021_1439_MOESM4_ESM.pdf [file 13058_2021_1439_MOESM4_ESM.pdf]

**Additional file 4. Expected and observed number of breast cancer in the test subcohort of China Kadoorie Biobank (CKB) and Shanghai Women's Health Study (SWHS) using the corresponding local rates**

|                                                             | Test subcohort of CKB <sup>a</sup> |          |                     | SWHS <sup>b</sup> |          |                     |
|-------------------------------------------------------------|------------------------------------|----------|---------------------|-------------------|----------|---------------------|
|                                                             | <i>E</i>                           | <i>O</i> | <i>E/O</i> (95% CI) | <i>E</i>          | <i>O</i> | <i>E/O</i> (95% CI) |
| Overall                                                     | 765                                | 751      | 1.02 (0.95-1.10)    | 1,423             | 1,409    | 1.01 (0.96-1.06)    |
| Age at enrollment, years                                    |                                    |          |                     |                   |          |                     |
| <50                                                         | 372                                | 357      | 1.04 (0.94-1.16)    | 793               | 688      | 1.15 (1.07-1.24)    |
| 50-59                                                       | 278                                | 256      | 1.08 (0.96-1.23)    | 391               | 394      | 0.99 (0.90-1.10)    |
| ≥60                                                         | 115                                | 138      | 0.84 (0.71-0.99)    | 239               | 327      | 0.73 (0.65-0.82)    |
| Residence                                                   |                                    |          |                     |                   |          |                     |
| Rural                                                       | 264                                | 267      | 0.99 (0.88-1.12)    | --                | --       | --                  |
| Urban                                                       | 501                                | 484      | 1.03 (0.95-1.13)    | --                | --       | --                  |
| Highest education                                           |                                    |          |                     |                   |          |                     |
| Primary school or lower                                     | 299                                | 299      | 1.00 (0.89-1.12)    | 160               | 195      | 0.82 (0.71-0.95)    |
| Middle school                                               | 226                                | 212      | 1.07 (0.93-1.23)    | 522               | 503      | 1.04 (0.95-1.14)    |
| High school or higher                                       | 239                                | 240      | 1.00 (0.88-1.14)    | 740               | 711      | 1.04 (0.97-1.12)    |
| BMI, kg/m <sup>2</sup>                                      |                                    |          |                     |                   |          |                     |
| <18.5                                                       | 19                                 | 17       | 1.13 (0.71-1.94)    | 37                | 38       | 0.98 (0.72-1.39)    |
| 18.5-23.9                                                   | 334                                | 326      | 1.03 (0.92-1.15)    | 678               | 660      | 1.03 (0.95-1.11)    |
| 24.0-27.9                                                   | 288                                | 282      | 1.02 (0.91-1.15)    | 513               | 512      | 1.00 (0.92-1.10)    |
| ≥28                                                         | 123                                | 126      | 0.98 (0.82-1.18)    | 195               | 199      | 0.98 (0.85-1.13)    |
| Height, cm                                                  |                                    |          |                     |                   |          |                     |
| <150.2                                                      | 127                                | 122      | 1.04 (0.87-1.26)    | 93                | 119      | 0.78 (0.65-0.94)    |
| 150.2-154.1                                                 | 168                                | 151      | 1.11 (0.95-1.31)    | 200               | 199      | 1.01 (0.88-1.16)    |
| 154.2-158.1                                                 | 206                                | 217      | 0.95 (0.83-1.09)    | 389               | 387      | 1.00 (0.91-1.11)    |
| ≥158.2                                                      | 263                                | 261      | 1.01 (0.89-1.14)    | 741               | 704      | 1.05 (0.98-1.13)    |
| No. of first-degree relatives diagnosed with overall cancer |                                    |          |                     |                   |          |                     |
| 0                                                           | 598                                | 573      | 1.04 (0.96-1.14)    | 1,000             | 1,023    | 0.98 (0.92-1.04)    |
| 1                                                           | 136                                | 144      | 0.95 (0.80-1.12)    | 340               | 329      | 1.03 (0.93-1.15)    |
| ≥2                                                          | 30                                 | 34       | 0.89 (0.64-1.28)    | 83                | 57       | 1.45 (1.12-1.91)    |
| No. of live birth                                           |                                    |          |                     |                   |          |                     |
| Nulliparous                                                 | 14                                 | 12       | 1.18 (0.68-2.29)    | 56                | 58       | 0.96 (0.75-1.27)    |
| 1                                                           | 376                                | 353      | 1.07 (0.96-1.19)    | 914               | 822      | 1.11 (1.04-1.19)    |
| ≥2                                                          | 374                                | 386      | 0.97 (0.88-1.07)    | 453               | 529      | 0.86 (0.79-0.93)    |
| Age at menarche, years                                      |                                    |          |                     |                   |          |                     |
| <12                                                         | 60                                 | 60       | 1.00 (0.77-1.31)    | 127               | 105      | 1.21 (1.00-1.48)    |
| 13-14                                                       | 255                                | 266      | 0.96 (0.85-1.09)    | 599               | 567      | 1.06 (0.97-1.15)    |
| 15-16                                                       | 276                                | 275      | 1.00 (0.89-1.13)    | 519               | 553      | 0.94 (0.86-1.02)    |
| ≥17                                                         | 173                                | 150      | 1.16 (0.99-1.37)    | 178               | 184      | 0.97 (0.84-1.12)    |

Abbreviations: BMI, body mass index; PY, person-year; RR, relative risk; CI, confidence interval; E, expected number of cases; O, observed number of cases; --, not applicable.

<sup>a</sup>Absolute risk was recalibrated using the breast cancer incidence rates and non-breast cancer mortality rates in the CKB.

<sup>b</sup>Absolute risk was recalibrated using the breast cancer incidence rates and non-breast cancer mortality rates in Shanghai (Additional file 2).
