# Supplementary material for: Development and external validation of a breast cancer absolute risk prediction model in Chinese population
Source: Springer Nature journal article supplement (doi:10.1186/s13058-021-01439-2), 2021-05-29
Supplement: 13058_2021_1439_MOESM5_ESM.pdf [file 13058_2021_1439_MOESM5_ESM.pdf]

**Additional file 5. Performance of the breast cancer prediction model across different predicted risk cutoffs in the test subcohort of China Kadoorie Biobank**

| Cutoff of 10-year risk (%) | Percent of high-risk population (%) <sup>a</sup> | Sensitivity (%) | Specificity (%) | Positive predictive value (%) | Negative predictive value (%) | Number needed to be screened to identify one case |
|----------------------------|--------------------------------------------------|-----------------|-----------------|-------------------------------|-------------------------------|---------------------------------------------------|
| 0.4                        | 84.74                                            | 94.90           | 15.34           | 0.82                          | 99.75                         | 121.51                                            |
| 0.5                        | 70.89                                            | 86.17           | 29.23           | 0.89                          | 99.65                         | 111.96                                            |
| 0.6                        | 56.17                                            | 74.27           | 43.96           | 0.97                          | 99.57                         | 102.92                                            |
| 0.7                        | 42.93                                            | 65.05           | 57.24           | 1.11                          | 99.55                         | 89.81                                             |
| 0.8                        | 32.19                                            | 55.58           | 67.99           | 1.27                          | 99.52                         | 78.80                                             |
| 0.9                        | 24.27                                            | 45.63           | 75.88           | 1.38                          | 99.47                         | 72.39                                             |
| 1.0                        | 18.26                                            | 38.11           | 81.88           | 1.53                          | 99.44                         | 65.22                                             |
| 1.1                        | 13.61                                            | 31.80           | 86.52           | 1.72                          | 99.42                         | 58.27                                             |
| 1.2                        | 10.32                                            | 26.21           | 89.80           | 1.87                          | 99.40                         | 53.57                                             |
| 1.3                        | 7.78                                             | 21.60           | 92.32           | 2.04                          | 99.38                         | 49.01                                             |
| 1.4                        | 5.73                                             | 17.23           | 94.36           | 2.21                          | 99.35                         | 45.23                                             |
| 1.5                        | 4.13                                             | 12.38           | 95.93           | 2.20                          | 99.33                         | 45.45                                             |
| 1.6                        | 3.05                                             | 9.95            | 97.00           | 2.40                          | 99.32                         | 41.68                                             |
| 1.7                        | 2.18                                             | 6.80            | 97.85           | 2.29                          | 99.30                         | 43.75                                             |
| 1.8                        | 1.64                                             | 5.10            | 98.39           | 2.29                          | 99.29                         | 43.71                                             |
| 1.9                        | 1.13                                             | 3.88            | 98.89           | 2.52                          | 99.29                         | 39.75                                             |
| 2.0                        | 0.79                                             | 2.67            | 99.22           | 2.48                          | 99.28                         | 40.36                                             |

<sup>a</sup>High-risk population is defined as people whose 10-year predicted risk are higher than the corresponding cutoff.
