# Supplementary material for: Development and external validation of a breast cancer absolute risk prediction model in Chinese population
Source: Springer Nature journal article supplement (doi:10.1186/s13058-021-01439-2), 2021-05-29
Supplement: 13058_2021_1439_MOESM6_ESM.pdf [file 13058_2021_1439_MOESM6_ESM.pdf]

**Additional file 6. Performance of the breast cancer prediction model across different predicted risk cutoffs in the Shanghai Women's Health Study**

| Cutoff of 10-year risk (%) | Percent of high-risk population (%) <sup>a</sup> | Sensitivity (%) | Specificity (%) | Positive predictive value (%) | Negative predictive value (%) | Number needed to be screened to identify one case |
|----------------------------|--------------------------------------------------|-----------------|-----------------|-------------------------------|-------------------------------|---------------------------------------------------|
| 0.4                        | 96.57                                            | 98.91           | 3.46            | 1.21                          | 99.63                         | 82.86                                             |
| 0.5                        | 92.15                                            | 96.00           | 7.90            | 1.23                          | 99.40                         | 81.46                                             |
| 0.6                        | 87.08                                            | 91.77           | 12.98           | 1.24                          | 99.25                         | 80.53                                             |
| 0.7                        | 81.44                                            | 86.68           | 18.62           | 1.25                          | 99.15                         | 79.74                                             |
| 0.8                        | 73.96                                            | 80.15           | 26.12           | 1.28                          | 99.10                         | 78.32                                             |
| 0.9                        | 64.42                                            | 72.28           | 35.68           | 1.32                          | 99.08                         | 75.64                                             |
| 1.0                        | 54.00                                            | 63.44           | 46.11           | 1.38                          | 99.06                         | 72.25                                             |
| 1.1                        | 43.75                                            | 54.00           | 56.38           | 1.45                          | 99.04                         | 68.76                                             |
| 1.2                        | 34.96                                            | 44.79           | 65.16           | 1.51                          | 99.00                         | 66.23                                             |
| 1.3                        | 27.55                                            | 37.17           | 72.57           | 1.59                          | 98.98                         | 62.90                                             |
| 1.4                        | 21.53                                            | 30.51           | 78.58           | 1.67                          | 98.96                         | 59.88                                             |
| 1.5                        | 16.74                                            | 25.06           | 83.36           | 1.76                          | 98.94                         | 56.70                                             |
| 1.6                        | 12.95                                            | 20.58           | 87.14           | 1.87                          | 98.92                         | 53.41                                             |
| 1.7                        | 9.89                                             | 16.46           | 90.19           | 1.96                          | 98.91                         | 50.97                                             |
| 1.8                        | 7.47                                             | 13.08           | 92.59           | 2.06                          | 98.89                         | 48.51                                             |
| 1.9                        | 5.59                                             | 9.56            | 94.46           | 2.02                          | 98.87                         | 49.61                                             |
| 2.0                        | 4.37                                             | 7.75            | 95.67           | 2.09                          | 98.86                         | 47.86                                             |

<sup>a</sup>High-risk population is defined as people whose 10-year predicted risk are higher than the corresponding cutoff.
