# Supplementary material for: Development and external validation of a breast cancer absolute risk prediction model in Chinese population
Source: Springer Nature journal article supplement (doi:10.1186/s13058-021-01439-2), 2021-05-29
Supplement: MOESM1 [file 19209568]

**Additional file 1. Comparison of Age-adjusted RR (95% CI) for breast cancer among women in urban and rural areas of China Kadoorie Biobank**

|                                                            | Urban |                     |                     | Rural |                     |                     |
|------------------------------------------------------------|-------|---------------------|---------------------|-------|---------------------|---------------------|
|                                                            | Cases | Cases/PYs (/10,000) | RR (95% CI)         | Cases | Cases/PYs (/10,000) | RR (95% CI)         |
| <b>Highest education</b>                                   |       |                     |                     |       |                     |                     |
| No formal school                                           | 126   | 54.98               | 1.00 (reference)    | 213   | 40.17               | 1.00 (reference)    |
| Primary school                                             | 257   | 96.41               | 1.17 (1.10 to 1.24) | 313   | 45.99               | 1.17 (1.07 to 1.29) |
| Middle school                                              | 454   | 113.97              | 1.36 (1.21 to 1.53) | 199   | 53.57               | 1.37 (1.14 to 1.65) |
| High school                                                | 448   | 145.2               | 1.59 (1.34 to 1.89) | 57    | 58.71               | 1.61 (1.22 to 2.12) |
| College/university                                         | 206   | 168.25              | 1.85 (1.47 to 2.33) | 14    | 130.35              | 1.89 (1.31 to 2.73) |
| <b>BMI at attained age &lt; 50 years, kg/m<sup>2</sup></b> |       |                     |                     |       |                     |                     |
| <18.5                                                      | 10    | 111.76              | 1.00 (reference)    | 11    | 89.43               | 1.00 (reference)    |
| <24.0                                                      | 217   | 198.34              | 0.92 (0.79 to 1.07) | 140   | 80.93               | 0.99 (0.83 to 1.19) |
| <28.0                                                      | 109   | 257.99              | 0.84 (0.62 to 1.14) | 78    | 104.95              | 0.99 (0.69 to 1.42) |
| ≥28.0                                                      | 20    | 169.83              | 0.77 (0.48 to 1.22) | 23    | 115.65              | 0.98 (0.57 to 1.69) |
| <b>BMI at attained age ≥ 50 years, kg/m<sup>2</sup></b>    |       |                     |                     |       |                     |                     |
| <18.5                                                      | 18    | 57.96               | 1.00 (reference)    | 18    | 29.43               | 1.00 (reference)    |
| <24.0                                                      | 405   | 101.48              | 1.25 (1.16 to 1.36) | 237   | 42.02               | 1.25 (1.12 to 1.40) |
| <28.0                                                      | 470   | 127.47              | 1.57 (1.34 to 1.84) | 213   | 60.28               | 1.57 (1.25 to 1.96) |
| ≥28.0                                                      | 242   | 158.83              | 1.97 (1.56 to 2.49) | 76    | 65.23               | 1.96 (1.40 to 2.74) |
| <b>Height, cm</b>                                          |       |                     |                     |       |                     |                     |
| 100-                                                       | 212   | 84.17               | 1.00 (reference)    | 170   | 34.79               | 1.00 (reference)    |
| 150.2-                                                     | 299   | 95.9                | 1.14 (1.08 to 1.20) | 205   | 46.14               | 1.13 (1.05 to 1.21) |
| 154.2-                                                     | 379   | 109.28              | 1.29 (1.16 to 1.43) | 217   | 52.67               | 1.27 (1.10 to 1.46) |
| 158.2-                                                     | 601   | 144.97              | 1.47 (1.25 to 1.72) | 204   | 59.11               | 1.43 (1.16 to 1.76) |
| <b>Family history of cancer</b>                            |       |                     |                     |       |                     |                     |
| no family history                                          | 1,161 | 108.93              | 1.00 (reference)    | 634   | 44.03               | 1.00 (reference)    |
| One relative history                                       | 270   | 120.62              | 1.04 (0.91 to 1.19) | 132   | 60.19               | 1.24 (1.02 to 1.50) |
| More than one                                              | 60    | 169.7               | 1.42 (1.09 to 1.85) | 30    | 97.48               | 1.96 (1.35 to 2.85) |
| <b>Live birth count</b>                                    |       |                     |                     |       |                     |                     |
| Nulliparous                                                | 36    | 141.05              | 1.86 (1.27 to 2.71) | 9     | 62.61               | 1.74 (0.89 to 3.41) |
| 1                                                          | 856   | 125.38              | 1.77 (1.42 to 2.21) | 211   | 57.8                | 1.49 (1.13 to 1.95) |
| 2                                                          | 366   | 117.81              | 1.43 (1.18 to 1.74) | 353   | 53.61               | 1.38 (1.12 to 1.68) |
| ≥3                                                         | 233   | 76.11               | 1.00 (reference)    | 223   | 34.19               | 1.00 (reference)    |
| <b>Age at menarche, years</b>                              |       |                     |                     |       |                     |                     |
| <12                                                        | 134   | 160.4               | 1.50 (1.24 to 1.80) | 53    | 66.67               | 1.56 (1.21 to 2.00) |
| 13-14                                                      | 507   | 126.34              | 1.31 (1.16 to 1.48) | 241   | 53.85               | 1.34 (1.14 to 1.59) |
| 15-16                                                      | 537   | 112.23              | 1.14 (1.08 to 1.22) | 300   | 46.27               | 1.16 (1.07 to 1.26) |
| ≥17                                                        | 313   | 86.53               | 1.00 (reference)    | 202   | 39.25               | 1.00 (reference)    |

Abbreviations: BMI, body mass index; PY, person-year; RR, relative risk; CI, confidence interval.

Cox model was stratified by 5 study sites and age at baseline in a 5-year interval, and included all the predictors in the table.
