# Supplementary material for: Development and external validation of a breast cancer absolute risk prediction model in Chinese population
Source: Springer Nature journal article supplement (doi:10.1186/s13058-021-01439-2), 2021-05-29
Supplement: MOESM7 [file 19209568]

**Additional file 7. Validation of the Asian America Breast Cancer Study model (AABCS) for predicting individual breast cancer risk in China Kadoorie Biobank (CKB) and Shanghai Women's Health Study (SWHS)**

|                                           | CKB                      |                           |          |          |                     | SWHS                     |                           |          |          |                     |
|-------------------------------------------|--------------------------|---------------------------|----------|----------|---------------------|--------------------------|---------------------------|----------|----------|---------------------|
|                                           | Overall AUC <sup>a</sup> | Adjusted AUC <sup>b</sup> | <i>E</i> | <i>O</i> | <i>E/O</i> (95% CI) | Overall AUC <sup>a</sup> | Adjusted AUC <sup>b</sup> | <i>E</i> | <i>O</i> | <i>E/O</i> (95% CI) |
| <i>Original AABCS model</i>               |                          |                           |          |          |                     |                          |                           |          |          |                     |
| Overall                                   | 0.574 (0.558-0.590)      | 0.543 (0.527-0.559)       | 4,325    | 2,287    | 1.89 (1.82-1.97)    | 0.553 (0.532-0.573)      | 0.556 (0.535-0.576)       | 1,639    | 1,409    | 1.16 (1.10-1.23)    |
| 1                                         | --                       | --                        | 180      | 154      | 1.17 (1.00-1.38)    | --                       | --                        | 102      | 117      | 0.87 (0.73-1.05)    |
| 2                                         | --                       | --                        | 250      | 181      | 1.38 (1.19-1.60)    | --                       | --                        | 132      | 125      | 1.06 (0.89-1.27)    |
| 3                                         | --                       | --                        | 276      | 162      | 1.70 (1.46-2.00)    | --                       | --                        | 143      | 132      | 1.08 (0.91-1.30)    |
| 4                                         | --                       | --                        | 318      | 212      | 1.50 (1.31-1.73)    | --                       | --                        | 140      | 117      | 1.19 (1.00-1.44)    |
| 5                                         | --                       | --                        | 354      | 181      | 1.96 (1.69-2.27)    | --                       | --                        | 147      | 121      | 1.22 (1.02-1.47)    |
| 6                                         | --                       | --                        | 363      | 193      | 1.88 (1.63-2.18)    | --                       | --                        | 161      | 132      | 1.22 (1.03-1.45)    |
| 7                                         | --                       | --                        | 406      | 269      | 1.51 (1.34-1.71)    | --                       | --                        | 176      | 131      | 1.35 (1.13-1.61)    |
| 8                                         | --                       | --                        | 465      | 292      | 1.59 (1.42-1.79)    | --                       | --                        | 181      | 163      | 1.11 (0.95-1.30)    |
| 9                                         | --                       | --                        | 599      | 306      | 1.96 (1.75-2.20)    | --                       | --                        | 200      | 169      | 1.18 (1.02-1.38)    |
| 10                                        | --                       | --                        | 1115     | 337      | 3.31 (2.97-3.69)    | --                       | --                        | 258      | 202      | 1.28 (1.11-1.47)    |
| <i>Calibrated AABCS model<sup>c</sup></i> |                          |                           |          |          |                     |                          |                           |          |          |                     |
| Overall                                   | 0.608 (0.0.592-0.623)    | 0.544 (0.529-0.590)       | 2,147    | 2,287    | 0.94 (0.90-0.98)    | 0.550 (0.530-0.570)      | 0.555 (0.535-0.575)       | 942      | 1,409    | 0.67 (0.63-0.71)    |
| 1                                         | --                       | --                        | 81       | 108      | 0.75 (0.62-0.91)    | --                       | --                        | 52       | 116      | 0.44 (0.37-0.54)    |
| 2                                         | --                       | --                        | 110      | 148      | 0.74 (0.63-0.88)    | --                       | --                        | 61       | 107      | 0.57 (0.47-0.70)    |
| 3                                         | --                       | --                        | 128      | 136      | 0.94 (0.80-1.13)    | --                       | --                        | 78       | 134      | 0.58 (0.49-0.69)    |
| 4                                         | --                       | --                        | 142      | 150      | 0.95 (0.81-1.12)    | --                       | --                        | 83       | 110      | 0.75 (0.63-0.92)    |
| 5                                         | --                       | --                        | 153      | 202      | 0.76 (0.66-0.87)    | --                       | --                        | 90       | 149      | 0.61 (0.52-0.72)    |
| 6                                         | --                       | --                        | 181      | 207      | 0.88 (0.76-1.01)    | --                       | --                        | 97       | 145      | 0.67 (0.57-0.79)    |

|    |    |    |     |     |                  |    |    |     |     |                  |
|----|----|----|-----|-----|------------------|----|----|-----|-----|------------------|
| 7  | -- | -- | 206 | 256 | 0.80 (0.71-0.91) | -- | -- | 104 | 145 | 0.71 (0.61-0.85) |
| 8  | -- | -- | 255 | 336 | 0.76 (0.68-0.85) | -- | -- | 106 | 140 | 0.76 (0.64-0.90) |
| 9  | -- | -- | 305 | 363 | 0.84 (0.76-0.93) | -- | -- | 120 | 159 | 0.75 (0.64-0.88) |
| 10 | -- | -- | 588 | 381 | 1.54 (1.39-1.71) | -- | -- | 153 | 204 | 0.75 (0.65-0.86) |

Abbreviations: AUC, area under the curve; E, expected number of cases; O, observed number of cases; CI, confidence interval; --, not applicable.

<sup>a</sup>Overall AUC indicated the discriminating ability of the absolute risk predicted by our model.

<sup>b</sup>Adjusted AUC were estimated adjusting for residence (urban/rural) and 10 age groups at entry, i.e. the prediction effect of age and residence was removed.

<sup>c</sup>Calibrated using the breast cancer incidence rates and non-breast cancer mortality rates in China.
